# Supplementary material for: Oncolytic Reovirus and Immune Checkpoint Inhibition as a Novel Immunotherapeutic Strategy for Breast Cancer
Source: Cancers (Basel). 2018 Jun 15;10(6):205. doi: 10.3390/cancers10060205 (PMC6025420; doi:10.3390/cancers10060205)
Supplement: Supplementary file 1 [file cancers-10-00205-s001.pdf]

\*\*\* The editor has said, "Please correct the mismatches found between the labeling of supplementary figures and the legends." It is unclear what mismatches there are below... please clarify.

Formatted: Font: Palatino Linotype, 10 pt

## Appendix

Figure S1

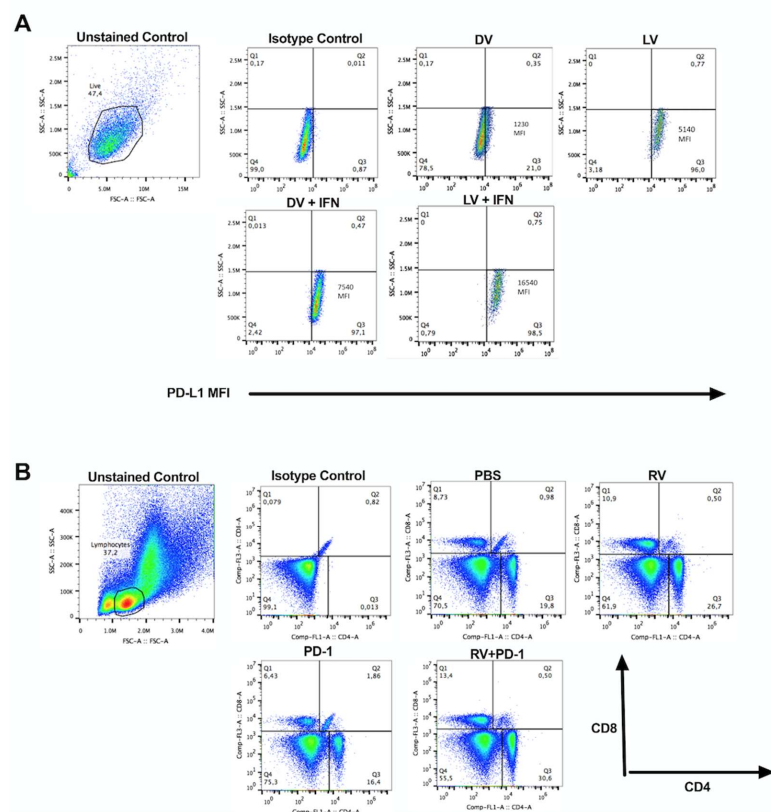

Figure S1. Representative flow cytometry gating strategies

A) PD-L1 expression on BrCa cell lines. Representative plot from MDA MB 468.

B) Quantification of CD4<sup>+</sup>/CD8<sup>+</sup> splenocytes from the *in vivo* EMT6 study. Representative plot shown.

**Figure S2**

**A**

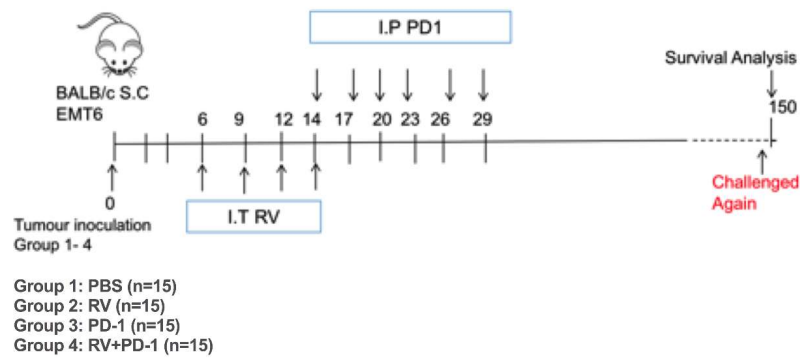

**Figure S2. Representative diagram of the *in vivo* experimental protocol**

A) Four groups of 12-week old BALB/c mice (Charles River) were implanted on day 0 with  $2 \times 10^5$  EMT6 cells subcutaneously (s.c) into the right mammary pad (N=15/group). Once tumors were palpable (approximately day 6), therapy was initiated. Mice were grouped into cohorts and treated with i.p PBS, intratumoral live RV ( $5 \times 10^8$  PFU), anti-PD-1 antibody (RMP1-14, BioXcell, Connecticut, USA )(0.2 mg i.p.), or a combination of these agents.

Figure S3

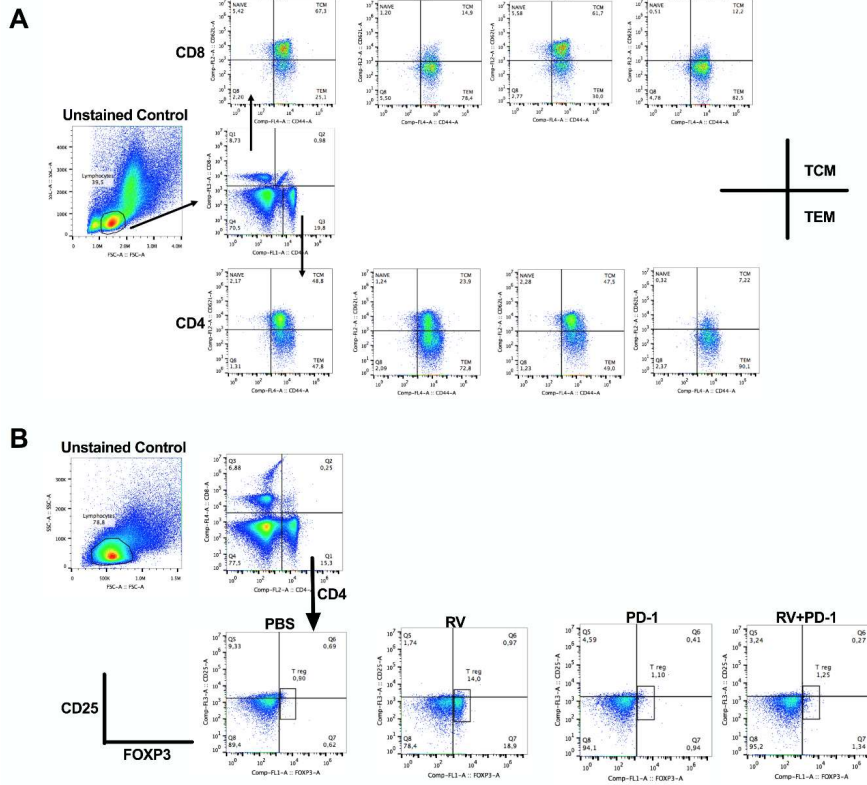

Figure S3. Representative flow cytometry gating strategies

A) Quantification of memory CD4<sup>+</sup>/CD8<sup>+</sup> T cells (TEM, TCM) from the *in vivo* EMT6 study. Representative plot shown.

B) Quantification of Treg (CD4<sup>+</sup> CD25<sup>+</sup> FOXP3<sup>+</sup>) from *in vivo* EMT6 study. Representative plot shown.

5

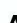

1
